# Supplementary material for: LYAR promotes colorectal cancer cell mobility by activating galectin-1 expression
Source: PubMed Central journal article supplement (PMC4741737; doi:10.18632/oncotarget.5335), 2015-09-25
Supplement: oncotarget-06-32890-s001.pdf [file oncotarget-06-32890-s001.pdf]

SUPPLEMENTARY FIGURES AND TABLES

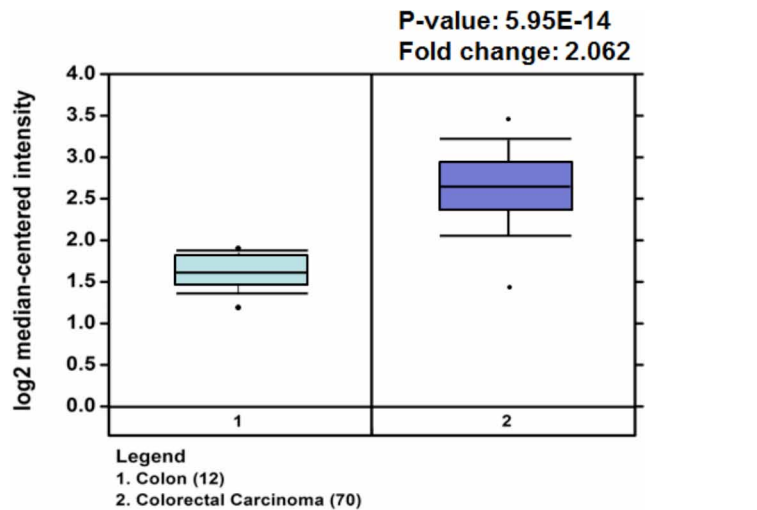

Supplementary Figure S1: LYAR mRNA levels in colorectal carcinoma and normal colon tissues from the Oncomine database (<http://www.oncomine.org>).

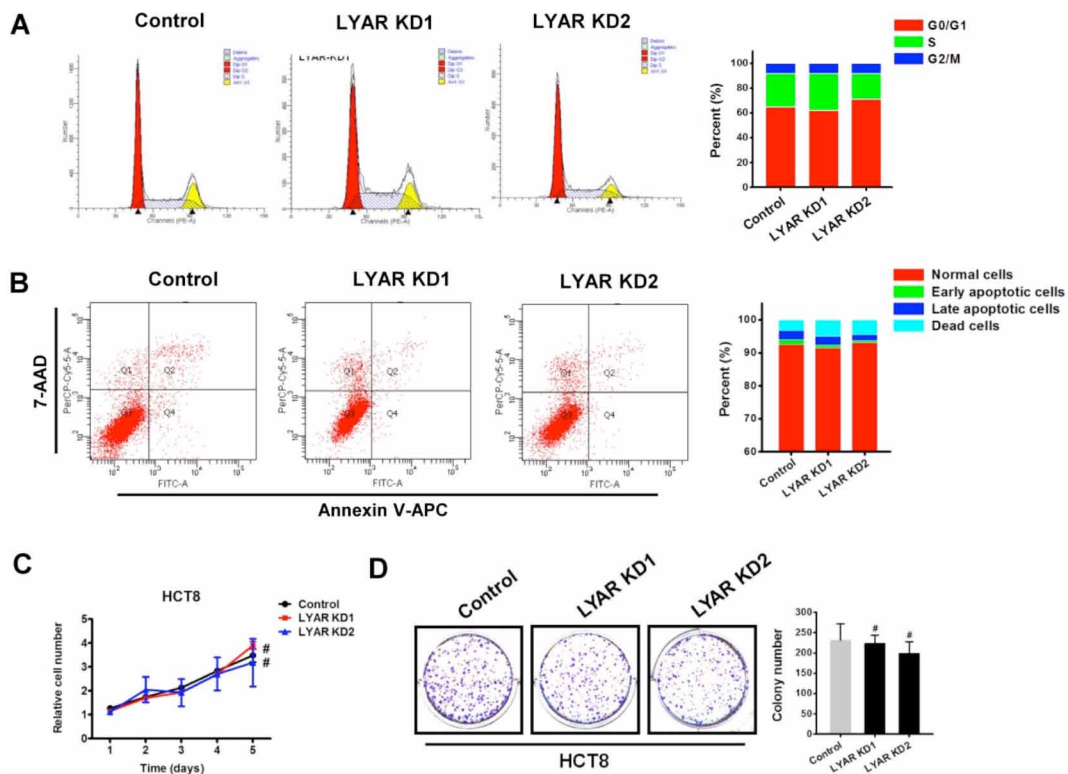

Supplementary Figure S2: LYAR knockdown has no effect on the cell cycle A., apoptosis B., cell proliferation C., and colony formation D. of colorectal HCT8 cells. # $P > 0.05$  compare to the scrambled control.

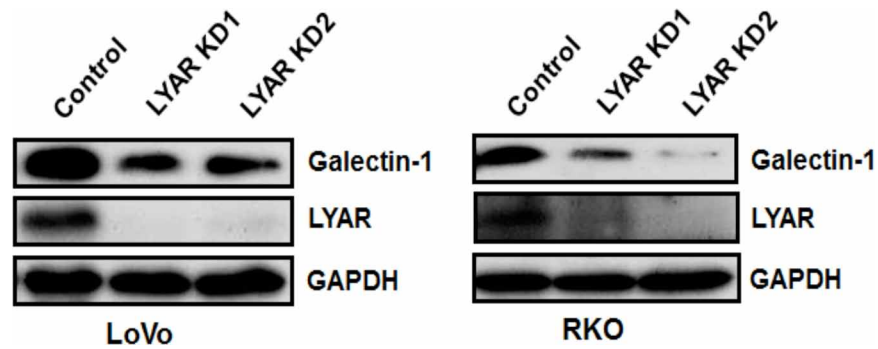

**Supplementary Figure S3: LYAR knockdown decreases Galectin-1 expression in LoVo and RKO cells.** Western blot assay showing LYAR and Galectin-1 protein expression following LYAR knockdown in Lovo and RKO cells. GAPDH serves as a loading control.

**Supplementary Table S1: Characteristics of LYAR expression in CRC patients**

| Clinicopathological feature | Total | LYAR     |          |
|-----------------------------|-------|----------|----------|
|                             |       | Low      | High     |
|                             | 77    | 39 (51%) | 38 (49%) |
| <i>Age</i>                  |       |          |          |
| < 60                        | 47    | 27       | 20       |
| ≥60                         | 30    | 12       | 18       |
| <i>Gender</i>               |       |          |          |
| Male                        | 49    | 23       | 26       |
| Female                      | 28    | 16       | 12       |
| <i>Grade</i>                |       |          |          |
| Good/moderate               | 57    | 31 (54%) | 26 (46%) |
| Poor                        | 20    | 8 (40%)  | 12 (60%) |
| <i>pM</i>                   |       |          |          |
| M0                          | 40    | 23 (58%) | 17 (42%) |
| M1                          | 37    | 16 (43%) | 21 (57%) |
| <i>Colon cancer</i>         | 21    | 5        | 16       |
| <i>Rectal cancer</i>        | 56    | 34       | 22       |

*pM*, distant metastasis; M0, no regional or distant metastasis; M1, regional or distant metastasis.

**Supplementary Table S2: List of the top 111 up-regulated genes following LYAR knockdown**

| Gene symbol  | mRNA accession  | Fold change |
|--------------|-----------------|-------------|
| NOX1         | NM_007052       | 2.10        |
| PTGS2        | NM_000963       | 2.02        |
| CLDN2        | NM_001171092    | 1.92        |
| MSANTD4      | NM_032424       | 1.91        |
| MGAT5        | NM_002410       | 1.89        |
| ANKRD52      | NM_173595       | 1.89        |
| TMEM2        | NM_013390       | 1.87        |
| IFNGR1       | NM_000416       | 1.86        |
| SKP2         | NM_001243120    | 1.85        |
| ARRDC3       | NM_020801       | 1.85        |
| PAPSS2       | NM_001015880    | 1.83        |
| REG4         | NM_001159352    | 1.81        |
| USP38        | NM_032557       | 1.80        |
| LOC100507039 | ENST00000433933 | 1.79        |
| LOC100507376 | ENST00000513179 | 1.79        |
| HSD3B1       | NM_000862       | 1.76        |
| DCBLD2       | NM_080927       | 1.75        |
| C1QTNF9B-AS1 | NM_001135816    | 1.74        |
| PGBD4        | NM_152595       | 1.73        |
| LGR5         | NM_003667       | 1.73        |
| WDR5B        | NM_019069       | 1.73        |
| LOC100134229 | NR_024451       | 1.73        |
| GBP3         | NM_018284       | 1.73        |
| OR10H2       | NM_013939       | 1.72        |
| RSL24D1P11   | ENST00000440667 | 1.70        |
| ME1          | NM_002395       | 1.70        |
| PLK2         | NM_001252226    | 1.69        |
| EID2B        | NM_152361       | 1.69        |
| MIR32        | NR_029506       | 1.68        |
| PTPRJ        | NM_001098503    | 1.67        |
| ANXA1        | NM_000700       | 1.67        |
| HEPH         | NM_001130860    | 1.67        |
| HMGCS2       | NM_001166107    | 1.67        |
| C2orf44      | NM_001142319    | 1.66        |
| LOC648809    | NR_036652       | 1.65        |
| EFTUD1       | NM_001040610    | 1.65        |

| Gene symbol | mRNA accession  | Fold change |
|-------------|-----------------|-------------|
| PTPLAD1     | NM_016395       | 1.65        |
| MUT         | NM_000255       | 1.65        |
| ZW10        | NM_004724       | 1.65        |
| SGPP1       | NM_030791       | 1.64        |
| E2F7        | NM_203394       | 1.64        |
| MOSPD1      | NM_019556       | 1.64        |
| HSDL2       | NM_001195822    | 1.64        |
| IFIT5       | NM_012420       | 1.63        |
| CYP39A1     | NM_016593       | 1.63        |
| SERINC1     | NM_020755       | 1.63        |
| C6orf47     | NM_021184       | 1.62        |
| ERVH48-1    | ENST00000447535 | 1.62        |
| LOC389641   | NR_033928       | 1.61        |
| WNK1        | BC130469        | 1.61        |
| KDELC2      | NM_153705       | 1.61        |
| MORC4       | NM_024657       | 1.61        |
| CD164       | NM_001142401    | 1.61        |
| TUG1        | NR_002323       | 1.60        |
| GTF2H1      | NM_001142307    | 1.60        |
| BMPR1APS2   | ENST00000451822 | 1.60        |
| RNU7-72P    | ENST00000516314 | 1.60        |
| C1QTNF9-AS1 | ENST00000449656 | 1.59        |
| C6orf120    | NM_001029863    | 1.59        |
| IGFL4       | NM_001002923    | 1.59        |
| GPR42       | ENST00000454971 | 1.59        |
| MTF2        | NM_001164391    | 1.59        |
| SNRPEP4     | ENST00000435815 | 1.59        |
| DDX6        | NM_004397       | 1.58        |
| ABCB1       | NM_000927       | 1.57        |
| CDH17       | NM_001144663    | 1.57        |
| PITPNA-AS1  | NR_028514       | 1.57        |
| TSPAN8      | NM_004616       | 1.57        |
| IGFL2       | NM_001002915    | 1.57        |
| MDM2        | NM_002392       | 1.57        |
| MED11       | NM_001001683    | 1.56        |
| TP53INP1    | NM_001135733    | 1.56        |
| LOC728819   | NM_001101330    | 1.55        |
| APPBP2      | NM_006380       | 1.55        |

| Gene symbol  | mRNA accession  | Fold change |
|--------------|-----------------|-------------|
| LACTB        | NM_032857       | 1.55        |
| RAB27B       | NM_004163       | 1.55        |
| MAP3K2       | NM_006609       | 1.55        |
| TRIM31-AS1   | ENST00000440874 | 1.55        |
| SAT1         | NM_002970       | 1.55        |
| ATP8B1       | NM_005603       | 1.55        |
| IL33         | NM_001199640    | 1.55        |
| BMPR1A       | NM_004329       | 1.55        |
| GCSHP3       | NR_033248       | 1.54        |
| LGALS8       | NM_006499       | 1.54        |
| ARRDC4       | NM_183376       | 1.54        |
| USP27X       | NM_001145073    | 1.54        |
| YEATS4       | NM_006530       | 1.53        |
| DCP2         | NM_001242377    | 1.53        |
| NT5E         | NM_001204813    | 1.53        |
| SLC12A2      | NM_001046       | 1.53        |
| PIGN         | NM_012327       | 1.53        |
| LOC100506676 | ENST00000413077 | 1.53        |
| RSPRY1       | NM_133368       | 1.53        |
| CADPS        | NM_003716       | 1.53        |
| ANKRD49      | NM_017704       | 1.52        |
| MIR3936      | NR_037500       | 1.52        |
| LINC00460    | NR_034119       | 1.52        |
| PLDN         | NM_012388       | 1.52        |
| ZNF543       | NM_213598       | 1.52        |
| CNOT6LP1     | ENST00000393358 | 1.52        |
| GALNT8       | NM_017417       | 1.52        |
| STX12        | NM_177424       | 1.51        |
| GDF11        | NM_005811       | 1.51        |
| LOC100129361 | NR_036583       | 1.51        |
| SCML1        | NM_001037535    | 1.51        |
| G3BP2        | NM_012297       | 1.50        |
| MRFAP1L1     | NM_203462       | 1.50        |
| BCL2L15      | NM_001010922    | 1.50        |
| LINC00339    | NR_023918       | 1.50        |
| FAM103A1     | NM_031452       | 1.50        |
| LRRC40       | NM_017768       | 1.50        |

**Supplementary Table S3: List of the top 131 down-regulated genes following LYAR knockdown**

| Gene symbol  | mRNA accession  | Fold change |
|--------------|-----------------|-------------|
| MCCD1        | NM_001011700    | 0.65        |
| RN5S263      | ENST00000363376 | 0.65        |
| CES2         | NM_003869       | 0.65        |
| LOC100505550 | ENST00000445172 | 0.65        |
| LOC646903    | NR_036538       | 0.65        |
| RN5S435      | ENST00000364044 | 0.65        |
| RN5S141      | ENST00000364543 | 0.65        |
| MIR422A      | ENST00000362286 | 0.65        |
| SNORD12      | NR_003030       | 0.65        |
| RN5S188      | ENST00000362916 | 0.65        |
| RN5S336      | ENST00000364189 | 0.65        |
| RN5S506      | ENST00000364816 | 0.65        |
| SNORD14E     | ENST00000364009 | 0.65        |
| RN5S270      | ENST00000411361 | 0.65        |
| RN5S265      | ENST00000411023 | 0.65        |
| SNORA30      | NR_002966       | 0.64        |
| SNORD1B      | NR_004396       | 0.64        |
| RNY3P3       | ENST00000363816 | 0.64        |
| MIR4462      | NR_039669       | 0.64        |
| SNORA23      | NR_002962       | 0.64        |
| RN5S134      | ENST00000516492 | 0.64        |
| TERC         | NR_001566       | 0.64        |
| RNU4ATAC     | NR_023343       | 0.64        |
| LOC100130776 | NR_027032       | 0.64        |
| MIRLET7F2    | NR_029484       | 0.64        |
| LOC100287404 | ENST00000515566 | 0.64        |
| RN5S308      | ENST00000362532 | 0.64        |
| RN5S449      | ENST00000516871 | 0.64        |
| USP17        | NM_001105662    | 0.64        |
| USP17        | NM_001632       | 0.64        |
| ALPP         | ENST00000364914 | 0.64        |
| SNORD14A     | NR_045370       | 0.64        |
| LOC100505815 | NM_032108       | 0.64        |
| SEMA6B       | ENST00000453284 | 0.63        |
| ZNF32-AS1    | NR_026818       | 0.63        |
| FAM138A      | NM_021049       | 0.63        |

| Gene symbol | mRNA accession  | Fold change |
|-------------|-----------------|-------------|
| MAGEA5      | ENST00000365378 | 0.63        |
| RN5S85      | ENST00000364931 | 0.63        |
| RNU5E-4P    | NR_002977       | 0.63        |
| SNORA45     | NM_017797       | 0.63        |
| BTBD2       | NR_039684       | 0.63        |
| MIR4473     | ENST00000364491 | 0.63        |
| RN5S433     | NM_001164453    | 0.63        |
| FAM90A20    | NR_000027       | 0.63        |
| SNORD83A    | ENST00000517249 | 0.63        |
| RN5S437     | NM_001007189    | 0.63        |
| IGIP        | ENST00000411404 | 0.63        |
| RNU2-6P     | NR_003022       | 0.63        |
| SNORA59B    | NR_003022       | 0.63        |
| SNORA59B    | ENST00000362698 | 0.63        |
| RNU5A-1     | NM_001362       | 0.62        |
| DIO3        | NR_002960       | 0.62        |
| SNORA20     | ENST00000364171 | 0.62        |
| RN5S242     | ENST00000516501 | 0.62        |
| RNY5        | NR_002913       | 0.62        |
| SNORD63     | ENST00000516076 | 0.62        |
| RN5S381     | NR_000024       | 0.62        |
| SNORD46     | ENST00000383970 | 0.61        |
| RNY1P8      | NM_181623       | 0.61        |
| KRTAP15-1   | NR_030173       | 0.61        |
| MIR432      | ENST00000364477 | 0.61        |
| RN5S69      | NR_029422       | 0.61        |
| RNU12       | NM_006834       | 0.61        |
| RAB32       | ENST00000362918 | 0.61        |
| RNY3P2      | NR_000025       | 0.61        |
| SNORD15B    | ENST00000365050 | 0.61        |
| RN5S442     | ENST00000410495 | 0.61        |
| RN5S338     | NR_003005       | 0.61        |
| SCARNA4     | NM_001242791    | 0.61        |
| FLJ45513    | NM_001013653    | 0.61        |
| LRRC26      | NM_030876       | 0.61        |
| OR5V1       | NR_036146       | 0.60        |

| Gene symbol | mRNA accession  | Fold change |
|-------------|-----------------|-------------|
| MIR548W     | NR_003029       | 0.60        |
| SNORD9      | NR_003066       | 0.60        |
| SNORD85     | NR_024277       | 0.60        |
| AGPAT4-IT1  | ENST00000390590 | 0.60        |
| IGHD3-3     | ENST00000516081 | 0.60        |
| RN5S497     | NM_001014291    | 0.60        |
| SPRR2G      | NM_001029891    | 0.60        |
| PGAM4       | ENST00000516887 | 0.60        |
| RN5S34      | NR_003015       | 0.60        |
| SNORA53     | NM_000755       | 0.59        |
| CRAT        | ENST00000516442 | 0.59        |
| RN5S348     | NR_002997       | 0.59        |
| SCARNA1     | NR_003014       | 0.59        |
| SNORA47     | ENST00000363603 | 0.59        |
| RN5S507     | ENST00000516707 | 0.59        |
| RN5S82      | NR_003031       | 0.59        |
| SNORD11     | NM_019106       | 0.58        |
| ATP1A3      | NR_002974       | 0.58        |
| SNORA42     | ENST00000429561 | 0.58        |
| SHANK2-AS1  | NR_002953       | 0.58        |
| SNORA11     | ENST00000385293 | 0.57        |
| MIR616      | NM_001142776    | 0.57        |
| CHAC1       | ENST00000414156 | 0.57        |
| ERI3-IT1    | NR_002919       | 0.57        |
| SNORA5A     | NR_038970       | 0.56        |
| LOC283624   | ENST00000363245 | 0.56        |
| RN5S440     | NR_003007       | 0.56        |
| SCARNA23    | ENST00000516712 | 0.56        |
| RNU5D-2P    | NR_002921       | 0.56        |
| SNORA75     | NM_007028       | 0.56        |
| TRIM31      | ENST00000363286 | 0.55        |
| RNU5B-1     | NM_005860       | 0.55        |
| FSTL3       | NR_002964       | 0.55        |
| SNORA28     | NR_002576       | 0.55        |
| SNORA21     | NR_031751       | 0.55        |
| MIR2117     | NR_002449       | 0.54        |
| SNORA65     | NR_002585       | 0.54        |
| SNORA52     | NR_004398       | 0.54        |



| Gene symbol   | mRNA accession  | Fold change |
|---------------|-----------------|-------------|
| SNORD82       | NM_005323       | 0.54        |
| HIST1H1T      | NR_003058       | 0.54        |
| SNORD70       | NM_006688       | 0.53        |
| CIQL1         | NM_031313       | 0.53        |
| ALPPL2        | ENST00000364533 | 0.53        |
| SNORD14B      | NM_004157       | 0.52        |
| PRKAR2A       | NM_005893       | 0.52        |
| CCIN          | ENST00000411791 | 0.52        |
| FAM25E        | ENST00000426412 | 0.51        |
| FAM25D        | NM_001145725    | 0.51        |
| <b>LYAR</b>   | NR_000005       | 0.51        |
| SNORD15A      | NR_002950       | 0.51        |
| SNORA2A       | NR_002922       | 0.50        |
| SNORA13       | NR_004388       | 0.50        |
| SCARNA14      | NR_002754       | 0.49        |
| RNU5E-1       | NR_002915       | 0.48        |
| SNORA74A      | NM_002305       | 0.48        |
| <b>LGALS1</b> | NR_003021       | 0.46        |
| SNORA79       | NR_002951       | 0.44        |

Supplementary Table S4: ChIP primer sequences for the LGALS1 promoter

| Locus     | Forward              | Reverse               |
|-----------|----------------------|-----------------------|
| Primer 1: | TGCCACAGTGATCTTCCCTA | GGCAGAAGCTCCAGAATGAG  |
| Primer 2: | CTGGCCTTCTCATTCTGGAG | AGCCTGGGCAATAAGAGTGA  |
| Primer 3: | CCATGCCCAGCTAATTTTGT | GGTGGAAATCTGACCACAACC |
| Primer 4: | GGGCCTCAGAGGAGATGTTA | TAGAGACGGGGTTTCACCAC  |
| Primer 5: | CAGGGCGCTTTGACTATCC  | GAGGGCCACTGACTTAACCA  |
| Primer 6: | CCAGCTCTGATTCCCTGAAG | CAGAGTCCAAGCTCCACCTC  |
| Primer 7: | CATCTCTCTCGGGTGGAGTC | GCCACTGAGGTCCAGAAAAG  |
